# Supplementary material for: Bioactive Compounds and Antioxidant Activity in Seeds of Bred Lines of Common Bean Developed from Interspecific Crosses
Source: MDPI journal article supplement (doi:10.3390/foods12152849), 2023-07-27
Supplement: s1 [file s1]

Supplement 1. List of common bean genotypes used in the study

| Genotype | Commercial grain color | Genepool     | Growth habit | Classification | Cross within or between species |
|----------|------------------------|--------------|--------------|----------------|---------------------------------|
| ALB 121  | Brown                  | Mesoamerican | 2B           | Inbred line    | Pv x Pc                         |
| ALB 191  | Black                  | Mesoamerican | 2B           | Inbred line    | Pv x Pc                         |
| ALB 210  | Red                    | Mesoamerican | 2A           | Inbred line    | Pv x Pc                         |
| ALB 213  | Red                    | Mesoamerican | 2B           | Inbred line    | Pv x Pc                         |
| ALB 352  | Red                    | Mesoamerican | 2B           | Inbred line    | Pv x Pc                         |
| ALB 353  | Red                    | Mesoamerican | 2A           | Inbred line    | Pv x Pc                         |
| ALB 60   | Red                    | Mesoamerican | 2B           | Inbred line    | Pv x Pc                         |
| Amadeus  | Red                    | Mesoamerican | 2A           | Inbred line    | Pv                              |
| BFS 10   | Red                    | Mesoamerican | 2A           | Inbred line    | Pv                              |
| BFS 142  | Red                    | Mesoamerican | 2B           | Inbred line    | Pv x Pc                         |
| BFS 35   | Red                    | Mesoamerican | 2B           | Inbred line    | Pv                              |
| BFS 81   | Red                    | Mesoamerican | 2B           | Inbred line    | Pv x Pc                         |
| Calima   | Red mottled            | Andean       | 1            | Inbred line    | Pv                              |
| DAA 129  | Red pink               | Andean       | 2B           | Inbred line    | Pv                              |
| DAB 295  | Red mottled            | Andean       | 1            | Inbred line    | Pv                              |
| DOR 390  | Black                  | Mesoamerican | 2B           | Inbred line    | Pv                              |
| EMP 509  | Cream striped          | Mesoamerican | 2A           | Inbred line    | Pv                              |
| G40001   | White                  | Mesoamerican | 4A           | Inbred line    | Pa                              |
| G40058   | White                  | Mesoamerican | 4A           | Inbred line    | Pa                              |
| G40091   | Brown small            | Mesoamerican | 4A           | Inbred line    | Pa                              |
| G40177E3 | Brown small            | Mesoamerican | 4A           | Inbred line    | Pa                              |
| G40179   | Brown small            | Mesoamerican | 4A           | Inbred line    | Pa                              |
| G40192   | Brown small            | Mesoamerican | 4A           | Inbred line    | Pa                              |
| G40198   | Brown small            | Mesoamerican | 4A           | Inbred line    | Pa                              |
| G40203   | Brown small            | Mesoamerican | 4A           | Inbred line    | Pa                              |
| G40208   | Brown small            | Mesoamerican | 4A           | Inbred line    | Pa                              |
| G40210A  | Brown small            | Mesoamerican | 4A           | Inbred line    | Pa                              |
| G40221   | Brown small            | Mesoamerican | 4A           | Inbred line    | Pa                              |
| G40222   | Brown small            | Mesoamerican | 4A           | Inbred line    | Pa                              |

| Genotype     | Commercial grain color | Genepool     | Growth habit | Classification     | Cross within or between species |
|--------------|------------------------|--------------|--------------|--------------------|---------------------------------|
| G40236       | Brown small            | Mesoamerican | 4A           | Inbred line        | Pa                              |
| G40248       | Brown small            | Mesoamerican | 4A           | Inbred line        | Pa                              |
| G40248A      | Brown small            | Mesoamerican | 4A           | Inbred line        | Pa                              |
| G40249       | Brown small            | Mesoamerican | 4A           | Inbred line        | Pa                              |
| G40250       | Black small            | Mesoamerican | 4A           | Inbred line        | Pa                              |
| G40253       | Brown small            | Mesoamerican | 4A           | Inbred line        | Pa                              |
| G40254       | Brown small            | Mesoamerican | 4A           | Inbred line        | Pa                              |
| G40261       | Brown small            | Mesoamerican | 4A           | Inbred line        | Pa                              |
| G40270       | Orange mottled         | Mesoamerican | 4A           | Inbred line        | Pa                              |
| G40276       | White                  | Mesoamerican | 4A           | Inbred line        | Pa                              |
| GGR 131      | Red                    | Mesoamerican | 2A           | Inbred line        | Pv                              |
| GGR 150      | Cream red mottled      | Mesoamerican | 2B           | Inbred line        | Pv x Pc x Pa x Pd               |
| Ica Quimbaya | Red                    | Andean       | 1            | Commercial variety | Pv                              |
| INB 604      | Black                  | Mesoamerican | 2A           | Inbred line        | Pv x Pa                         |
| INB 841      | Brown speckled         | Mesoamerican | 2A           | Inbred line        | Pv x Pa                         |
| NCB 280      | Black                  | Mesoamerican | 2B           | Inbred line        | Pv                              |
| RRA 13       | Red                    | Andean       | 2B           | Inbred line        | Pv x Pc                         |
| RRA 57       | Red mottled            | Andean       | 1            | Inbred line        | Pv x Pc                         |
| RRA 60       | Red mottled            | Andean       | 1, 2A        | Inbred line        | Pv x Pc                         |
| RRA 68       | Red                    | Andean       | 2A           | Inbred line        | Pv x Pc                         |
| RRA 69       | Pink                   | Andean       | 2A           | Inbred line        | Pv x Pc                         |
| RRA 79       | Red                    | Andean       | 2A           | Inbred line        | Pv x Pc                         |
| RRA 81       | Red                    | Andean       | 2A           | Inbred line        | Pv x Pc                         |
| RRA 101      | Red                    | Andean       | 2B           | Inbred line        | Pv x Pc                         |
| RRA 123      | Pink                   | Andean       | 2B           | Inbred line        | Pv x Pc                         |
| RRA 177      | Red                    | Andean       | 2A           | Inbred line        | Pv x Pc                         |
| SAB 618      | Red mottled            | Andean       | 1            | Inbred line        | Pv                              |
| SAB 686      | Cream mottled          | Andean       | 1            | Inbred line        | Pv                              |
| SCR 23       | Red                    | Mesoamerican | 2B           | Inbred line        | Pv                              |
| SCR 40       | Red                    | Mesoamerican | 2B           | Inbred line        | Pv                              |

| Genotype | Commercial grain color | Genepool     | Growth habit | Classification | Cross within or between species |
|----------|------------------------|--------------|--------------|----------------|---------------------------------|
| SCR 56   | Red                    | Mesoamerican | 2B           | Inbred line    | Pv                              |
| SCR 61   | Red                    | Mesoamerican | 2B           | Inbred line    | Pv                              |
| SEF 10   | Red                    | Mesoamerican | 2A           | Inbred line    | Pv x Pc x Pa                    |
| SEF 12   | Red                    | Mesoamerican | 2A           | Inbred line    | Pv x Pc x Pa                    |
| SEF 14   | Red                    | Mesoamerican | 2A           | Inbred line    | Pv x Pc x Pa                    |
| SEF 16   | Red                    | Mesoamerican | 2A           | Inbred line    | Pv x Pc x Pa                    |
| SEF 27   | Red                    | Mesoamerican | 2B           | Inbred line    | Pv x Pc x Pa                    |
| SEF 40   | Red                    | Mesoamerican | 2A           | Inbred line    | Pv x Pc x Pa                    |
| SEF 42   | Red                    | Mesoamerican | 2A           | Inbred line    | Pv x Pc x Pa                    |
| SEF 49   | Red                    | Mesoamerican | 2A           | Inbred line    | Pv x Pc x Pa                    |
| SEF 56   | Red                    | Mesoamerican | 2B           | Inbred line    | Pv x Pc x Pa                    |
| SEF 59   | Red                    | Mesoamerican | 2A           | Inbred line    | Pv x Pc x Pa                    |
| SEF 70   | Red                    | Mesoamerican | 2B           | Inbred line    | Pv x Pc x Pa                    |
| SEF 71   | Red                    | Mesoamerican | 2A           | Inbred line    | Pv x Pc x Pa                    |
| SEF 73   | Red                    | Mesoamerican | 2B           | Inbred line    | Pv x Pc x Pa                    |
| SEN 46   | Black                  | Mesoamerican | 2B           | Inbred line    | Pv                              |
| SEN 48   | Black                  | Mesoamerican | 2B           | Inbred line    | Pv                              |
| SEN 52   | Black                  | Mesoamerican | 2A           | Inbred line    | Pv                              |
| SEN 70   | Black                  | Mesoamerican | 2B           | Inbred line    | Pv                              |
| SEN 97   | Black                  | Mesoamerican | 2B           | Inbred line    | Pv                              |
| SEN 135  | Black                  | Mesoamerican | 2A           | Inbred line    | Pv                              |
| SEN 136  | Black                  | Mesoamerican | 2A           | Inbred line    | Pv                              |
| SER 16   | Red                    | Mesoamerican | 2A           | Inbred line    | Pv                              |
| SER 48   | Red                    | Mesoamerican | 2B           | Inbred line    | Pv                              |
| SER 125  | Red                    | Mesoamerican | 2B           | Inbred line    | Pv                              |
| SER 212  | Red                    | Mesoamerican | 2A           | Inbred line    | Pv x Pa                         |
| SER 213  | Red                    | Mesoamerican | 2A           | Inbred line    | Pv x Pa                         |
| SER 271  | Red                    | Mesoamerican | 2A           | Inbred line    | Pv                              |
| SER 316  | Red                    | Mesoamerican | 2A           | Inbred line    | Pv                              |
| SER 323  | Red                    | Mesoamerican | 2A           | Inbred line    | Pv                              |

| Genotype   | Commercial grain color | Genepool     | Growth habit | Classification | Cross within or between species |
|------------|------------------------|--------------|--------------|----------------|---------------------------------|
| SIN 461-1  | Brown                  | Mesoamerican | 2B           | Inbred line    | Pv x Pa                         |
| SMC 205    | Red mottled            | Mesoamerican | 2B           | Inbred line    | Pv x Pc x Pa x Pd               |
| SMG 12     | Pink                   | Mesoamerican | 2A           | Inbred line    | Pv x Pc x Pa x Pd               |
| SMG 6      | Pink                   | Mesoamerican | 2A           | Inbred line    | Pv x Pc x Pa x Pd               |
| SMG 20     | Red Pink mottled       | Mesoamerican | 2B           | Inbred line    | Pv x Pc x Pa x Pd               |
| SMN 65     | Black                  | Mesoamerican | 2B           | Inbred line    | Pv                              |
| SMN 68     | Black                  | Mesoamerican | 2B           | Inbred line    | Pv                              |
| SMN 99     | Black                  | Mesoamerican | 2B           | Inbred line    | Pv                              |
| SMR 39     | Red                    | Mesoamerican | 2A           | Inbred line    | Pv                              |
| SMR 43     | Red                    | Mesoamerican | 2B           | Inbred line    | Pv                              |
| SMR 84     | Red                    | Mesoamerican | 2B           | Inbred line    | Pv x Pd                         |
| SMR 101    | Red                    | Mesoamerican | 2B           | Inbred line    | Pv                              |
| SMR 133    | Red                    | Mesoamerican | 2A           | Inbred line    | Pv                              |
| SMR 139    | Red                    | Mesoamerican | 2B           | Inbred line    | Pv                              |
| SMR 155    | Red                    | Mesoamerican | 2A           | Inbred line    | Pv                              |
| SMR 156    | Red                    | Mesoamerican | 2B           | Inbred line    | Pv                              |
| SMR 173    | Red                    | Mesoamerican | 2B           | Inbred line    | Pv                              |
| SMR 180    | Red                    | Mesoamerican | 2B           | Inbred line    | Pv                              |
| SMR 138    | Red                    | Mesoamerican | 2B           | Inbred line    | Pv                              |
| SXB 412    | Cream                  | Mesoamerican | 2B           | Inbred line    | Pv                              |
| Tio Canela | Red                    | Mesoamerican | 2A           | Inbred line    | Pv                              |
| VAP 15     | Red                    | Mesoamerican | 2B           | Inbred line    | Pv x Pa x Pparv                 |
| VAX 1      | Cream striped          | Mesoamerican | 3B           | Inbred line    | Pv                              |

Pv: *Phaseolus vulgaris*, Pc: *Phaseolus coccineus*, Pa: *Phaseolus acutifolius*, Pd: *Phaseolus dumosus*. Growth habit type I is an erect determinate bush, growth habit type IIA is an erect, indeterminate bush with short guide, growth habit type IIB is a semierect, indeterminate bush.
